# Supplementary material
Source: publisher figshare collection journal article supplement (https://acs.figshare.com/ndownloader/files/3803017)
Supplement: Supplementary file 1 [file 3803017]

#==============================================================================

# 1. SUBMISSION DETAILS

_publ_contact_author_name         'Prof. Simona Galli'
_publ_contact_author_address
;
      Dipartimento di Scienza e Alta Tecnologia,
      Universita' dell'Insubria,
      Via Valleggio 9, 22100 Como, Italy
;
_publ_contact_author_email        'simona.galli@uninsubria.it'
_publ_contact_author_fax          ?
_publ_contact_author_phone        '+39-031_2386627'

_publ_requested_journal           'Crystal growth and Design'
_publ_requested_category          'FA'
_publ_contact_letter
;  
;

#==============================================================================

# 2. PROCESSING SUMMARY (IUCr Office Use Only)

_journal_date_recd_electronic     ?
_journal_date_to_coeditor         ?
_journal_date_from_coeditor       ?
_journal_date_accepted            ?
_journal_date_printers_first      ?
_journal_date_printers_final      ?
_journal_date_proofs_out          ?
_journal_date_proofs_in           ?
_journal_coeditor_name            ?
_journal_coeditor_code            ?
_journal_coeditor_notes
; ?
;
_journal_techeditor_code          ?
_journal_paper_category           ?
_iucr_compatibility_tag           ?
_journal_techeditor_notes
; ?
;
_journal_coden_ASTM               ?
_journal_name_full                ?
_journal_year                     ? 
_journal_volume                   ?
_journal_issue                    ?
_journal_page_first               ? 
_journal_page_last                ?
_journal_suppl_publ_number        ?
_journal_suppl_publ_pages         ?


#==============================================================================

# 3. TITLE AND AUTHOR LIST

_publ_section_title
;
Novel Coordination Polymers with (Pyrazolato)-based Tectons:
Catalytic Activity in the Peroxidative Oxidation
of Alcohols and Cyclohexane
;

# The loop structure below should contain the names and addresses of all
# authors, in the required order of publication. Repeat as necessary. 

loop_
    _publ_author_name
    _publ_author_address
   
    'Timokin, Ivan'
;   School of Farmacy, Chemistry Section
    University of Camerino
    Via S. Agostino 1, 62032 Camerino, Italy
;
    'Pettinari, Claudio'
;   School of Farmacy, Chemistry Section
    University of Camerino
    Via S. Agostino 1, 62032 Camerino, Italy
;
    'Marchetti, Fabio'
;   School of Science and Technology, Chemistry Section
    University of Camerino
    Via S. Agostino 1, 62032 Camerino, Italy
;
    'Pettinari, Riccardo'
;   School of Farmacy, Chemistry Section
    University of Camerino
    Via S. Agostino 1, 62032 Camerino, Italy
;
    'Condello, Francesca'
;   School of Farmacy, Chemistry Section
    University of Camerino
    Via S. Agostino 1, 62032 Camerino, Italy
;
    'Galli, Simona'
;   Dipartimento di Scienza e Alta Tecnologia,
    Università degli Studi dell'Insubria,
    Via Valleggio 11, 22100 Como, Italy
;
    'Alegria, Elisabete C.B.A.'
;   Centro de Química Estrutural, Instituto Superior Técnico
    Universidade de Lisboa
    Av. Rovisco Pais, 1049-001 Lisboa, Portugal
;
    'Martins, Luísa M.D.R.S.'
;   Centro de Química Estrutural, Instituto Superior Técnico
    Universidade de Lisboa
    Av. Rovisco Pais, 1049-001 Lisboa, Portugal
;
    'Pombeiro, Armando J.L.'
;   Centro de Química Estrutural, Instituto Superior Técnico
    Universidade de Lisboa
    Av. Rovisco Pais, 1049-001 Lisboa, Portugal
;

#==============================================================================

#data_Compound_3Co

_chemical_name_systematic                           
;
catena-(bis(4-pyrazolato)methane)-co(ii)
;
_chemical_name_common             ?
_chemical_formula_moiety          'C7 H6 Co N4'
_chemical_formula_structural      'Co (C7 H6 N4)'
_chemical_formula_analytical      ?
_chemical_formula_iupac           ?
_chemical_formula_sum             'C7 H6 Co N4'
_chemical_formula_weight          205.09
_chemical_melting_point           ?
_chemical_compound_source         ?

loop_
    _atom_type_symbol
    _atom_type_description
#   _atom_type_scat_dispersion_real
#   _atom_type_scat_dispersion_imag
    _atom_type_scat_source
    
    C  C  'International Tables for Crystallography (Vol. IV)'
    H  H  'International Tables for Crystallography (Vol. IV)'
    Co Co 'International Tables for Crystallography (Vol. IV)'
    N  N  'International Tables for Crystallography (Vol. IV)'
        
#==============================================================================

# 1.5. POWDER SPECIMEN AND CRYSTAL DATA

_space_group_crystal_system        'monoclinic'
_space_group_name_H-M_alt 	   'C2/c'
_space_group_name_Hall   	    '?'

loop_
_symmetry_equiv_pos_as_xyz
	'-x, -y, -z'
	'-x, y, -z+1/2'
	'-x+1/2, -y+1/2, -z'
	'-x+1/2, y+1/2, -z+1/2'
	'x, -y, z+1/2'
	'x, y, z'
	'x+1/2, -y+1/2, z+1/2'
	'x+1/2, y+1/2, z'
	
_cell_length_a  9.57312(71)
_cell_length_b  14.3834(11)
_cell_length_c  7.09450(52)
_cell_angle_alpha 90
_cell_angle_beta  117.7923(38)
_cell_angle_gamma 90
_cell_volume 864.18(11)
_cell_formula_units_Z     4
_cell_measurement_temperature     298        


_pd_calibration_special_details      
; ?
;
_cell_special_details
; ?
;

_exptl_crystal_density_diffrn     1.58
_exptl_crystal_density_meas       ?
_exptl_crystal_density_method     'not measured'
_exptl_crystal_F_000              412

# The next three fields give the specimen dimensions in mm.  The equatorial 
# plane contains the incident and diffracted beam.
_pd_spec_size_axial                 5     # perpendicular to 
                                          # equatorial plane

_pd_spec_size_equat                 5     # parallel to 
                                          # scattering vector 
                                          # in transmission

_pd_spec_size_thick                 0.05  # parallel to 
                                          # scattering vector 
                                          # in reflection

# The next five fields are character fields that describe the specimen.

_pd_spec_mounting                          
;
 packed powder pellet
;
_pd_spec_mount_mode         'reflection'  # options are 'reflection' 
                                          # or 'transmission'

_pd_spec_shape              'flat_sheet'  # options are 'cylinder',
                                          # 'flat_sheet' or 'irregular'

_pd_char_particle_morphology ?                      
_pd_char_colour             'blue'        # use ICDD colour descriptions


# The next four fields are normally only needed for transmission experiments.
_exptl_absorpt_coefficient_mu     ?
_exptl_absorpt_correction_type    ?        
_exptl_absorpt_correction_T_min   ?        
_exptl_absorpt_correction_T_max   ?        

#==============================================================================

# 1.6. EXPERIMENTAL DATA

_exptl_special_details
; ?
;

# This following item is used to identify the equipment used to record the
# powder pattern when the diffractogram was measured at a laboratory
# other than the authors' home institution, e.g. when neutron or synchrotron
# radiation is used.

_pd_instr_location
; ?
;

_diffrn_ambient_temperature      298                    
_diffrn_source_target            Cu                                     
_diffrn_source_type              'sealed X-ray tube'
_diffrn_measurement_device_type  'Bruker AXS D8 Advance'       
_diffrn_detector_type            'Bruker Lynxeye linear PSD'        
_pd_meas_scan_method             'step'         # options are 'step', 'cont',
                                                # 'tof', 'fixed' or
                                                # 'disp' (= dispersive)
_pd_meas_special_details
;  ?
;

# The following six items are used for angular dispersive measurements only.

loop_
    _diffrn_radiation_type  'Cu K\a'                 
    _diffrn_radiation_wavelength             
       CuK\a~1~ 1.54056
       CuK\a~2~ 1.54439
_diffrn_radiation_monochromator   'Nickel filter'                

# The following four items give details of the measured (not processed)
# powder pattern.  Angles are in degrees.

_pd_meas_number_of_points       5001                                     
_pd_meas_2theta_range_min          5                   
_pd_meas_2theta_range_max        105                   
_pd_meas_2theta_range_inc          0.02

# The following three items are used for time-of-flight measurements only.

_pd_instr_dist_src/spec           ?                    
_pd_instr_dist_spec/detc          ?                    
_pd_meas_2theta_fixed             ?                    

# The following fields are used to identify the programs used.

_computing_data_collection        'Bruker D8 Commander'
_computing_cell_refinement        'TOPAS-R'
_computing_data_reduction         ?
_computing_structure_solution     'TOPAS-R'
_computing_structure_refinement   'TOPAS-R'
_computing_molecular_graphics     ?
_computing_publication_material   ?

#==============================================================================

# 1.7. REFINEMENT DATA

# Use the next field to give any special details about the fitting of the
# powder pattern.

_pd_proc_ls_special_details

; The use of a rigid body description for the crystallographically independent
  portion of the bis(pyrazolato)methane ligand does not allow the derivation
  of statistically meaningful s.u.'s for its atoms.
  
  S.u.'s are available only for the position of its center of mass (X, Y, Z)
  and its rotation angles:
  
  (X, Y, Z) = (0, -0.204(1), 0.25)
  (RX, RY, RZ) = (96.2(8), 123(14), 242(1))
  
  for the rigid body described as:
 
   z_matrix   C1
   z_matrix   C2   C1   =r1
   z_matrix   C3   C2   =r2  C1  126  
   z_matrix   H3   C3   =r3  C2  126    C1    0
   z_matrix   N1   C3   =r2  C2  108    C1  180 
   z_matrix   N2   N1   =r2  C3  108    C2    0 
   z_matrix   C4   N2   =r2  N1  108    C3    0 
   z_matrix   H4   C4   =r3  N2  126    N1  180

r1  1.50 refined
r2  1.36 fixed
r3  0.95 fixed
 
;
 
# The next three items are given as text
_pd_proc_ls_profile_function      'fundamental parameters approach'  
_pd_proc_ls_background_function   'Chebychev polynomial'     
_pd_proc_ls_pref_orient_corr      ?
_pd_proc_ls_prof_R_factor         0.016
_pd_proc_ls_prof_wR_factor        0.022         
_pd_proc_ls_prof_wR_expected      0.013

_refine_special_details
; ?
;

_refine_ls_structure_factor_coef     Inet
_refine_ls_matrix_type               fullcycle
_refine_ls_weighting_scheme          '1/[Y~i~]'
_refine_ls_hydrogen_treatment        ?
_refine_ls_extinction_method         none        
_refine_ls_extinction_coef           ?           
_refine_ls_number_parameters         32
_refine_ls_number_restraints         0
_refine_ls_number_constraints        ?
# The following item is 'CHI squared'
_refine_ls_goodness_of_fit_all       ?

_refine_ls_restrained_S_all          ?           
_refine_ls_restrained_S_obs          ?
_refine_ls_shift/su_max             .01
_refine_ls_shift/su_mean             ?


# The following four items apply to angular dispersive measurements.
# 2theta minimum, maximum and increment (in degrees) are for the 
# intensities used in the refinement.
_pd_proc_2theta_range_min         10.5             
_pd_proc_2theta_range_max        105             
_pd_proc_2theta_range_inc          0.02

loop_
      _pd_proc_wavelength       1.540562    1.544390   

_pd_block_diffractogram_id        ?            # The id used for the block
                                               # containing the powder 
                                               # pattern profile (section 11).

# Give appropriate details in the next two text fields.
_pd_proc_info_excluded_regions    ?             
_pd_proc_info_data_reduction      ?

#==============================================================================

# 1.8. ATOMIC COORDINATES AND DISPLACEMENT PARAMETERS

loop_
_atom_site_label
_atom_site_type_symbol
_atom_site_symmetry_multiplicity
_atom_site_fract_x
_atom_site_fract_y
_atom_site_fract_z
_atom_site_occupancy
_atom_site_B_iso_or_equiv
Co Co  4  0           0.48014(26)  0.25        1 6.61(60)
C1 C   4  0          -0.2044883    0.25        1 8.61(60)
C2 C   8 -0.1509169  -0.1507885    0.1749429   1 8.61(60)
C3 C   8 -0.2191417  -0.09713787  -0.003201398 1 8.61(60)
H3 H   8 -0.1795851  -0.08709145  -0.1019521   1 8.61(60)
N1 N   8 -0.353937   -0.06039463  -0.015156    1 8.61(60)
N2 N   8 -0.3690203  -0.09133665   0.1555999   1 8.61(60)
C4 C   8 -0.243547   -0.1472031    0.2730875   1 8.61(60)
H4 H   8 -0.2240314  -0.1782688    0.4012172   1 8.61(60)
H1 H   8  0.01117    -0.236        0.39658     1 8.61(60)
